# Supplementary material
Source: PubMed Central journal article supplement (PMC3275647)
Supplement: NIHMS351930-supplement-1_si_001.pdf [file NIHMS351930-supplement-1_si_001.pdf]

## **Intrinsic contribution of the 2'-hydroxyl to RNA conformational heterogeneity**

Elizabeth J. Denning and Alexander D. MacKerell Jr.\*

*Department of Pharmaceutical Sciences, University of Maryland, 20 Penn Street,  
Baltimore, MD 21201*

Supporting Information

**Figure S1:** Reference structure (Front and side view) for the 3D water probability distribution calculations. This template structure was used to align the individual nucleotides in the crystal structures using the ribose atoms for reference: C1', C2', C3', C4', and O4' atoms. The template structure was built within the CHARMM program and minimized using steepest decent while constraining the nucleotide geometry to an ideal RNA A-form commonly found in duplex RNA (see Table S1).

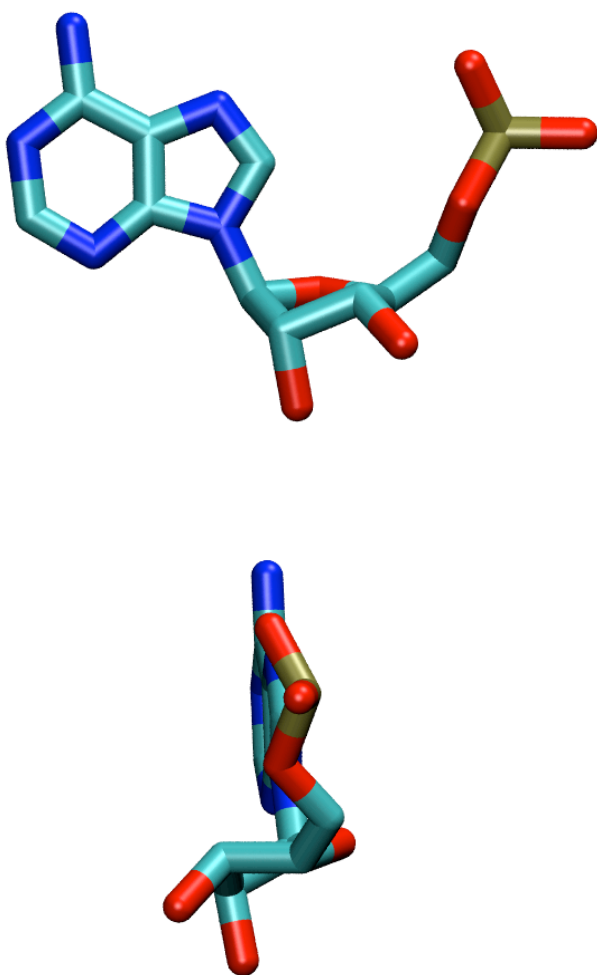

**Figure S2:** The initial starting geometry for the QM calculations using the NUSU model compound, containing the phosphodiester backbone and a uracil base, and a single water molecule. The water was placed at a distance of 2.77 Å between the water H and the O2' oxygen near the additional water distribution site found for non-canonical structures (see Figure 4, in main text). The QM calculations were performed at the MP2/6-31+G(d) level using the Gaussian03 package. **(A)** Side view **(B)** Bottom view.

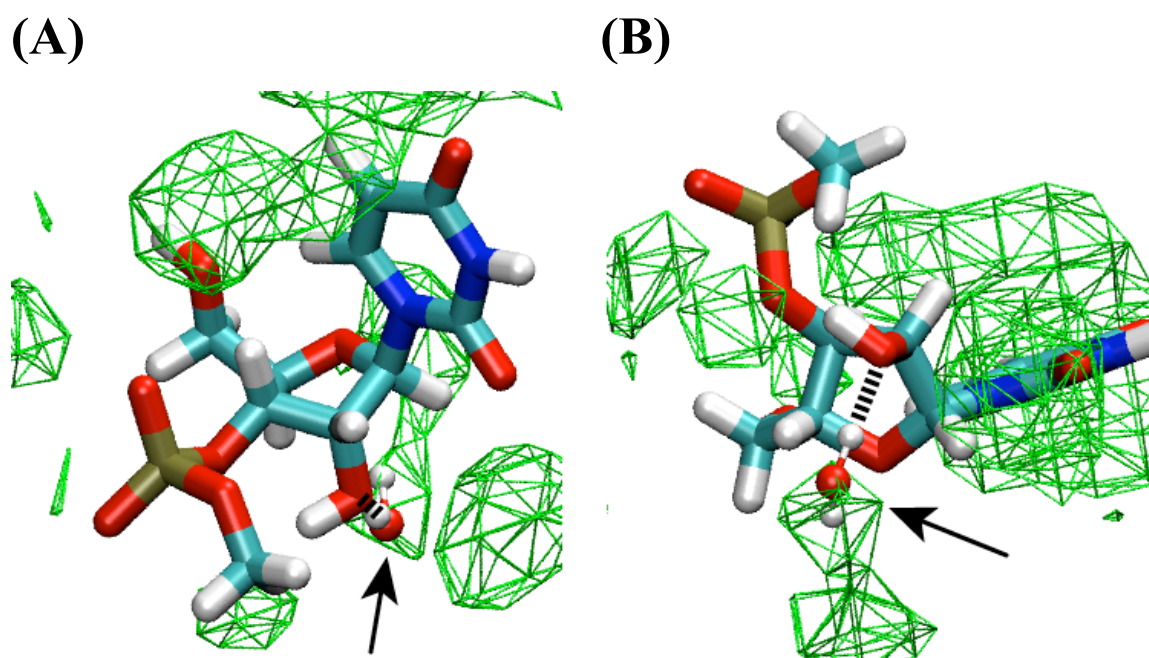

**Table S1.** The constraints used for the QM calculations.

| Target Dihedral            | A DNA               | B <sub>I</sub> DNA | B <sub>II</sub> DNA | A-RNA |
|----------------------------|---------------------|--------------------|---------------------|-------|
| $\alpha$ (O3'-P-O5'-C5')   | 291                 | 298                | 298                 | 291   |
| $\beta$ (P-O5'-C5'-C4')    | 175                 | 168                | 168                 | 174   |
| $\gamma$ (O5'-C5'-C4'-C3') | 57                  | 51                 | 51                  | 57    |
| $\epsilon$ (C4'-C3'-O3'-P) | 205                 | 195.7              | 267.2               | 211   |
| $\zeta$ (C3'-O3'-P-O5')    | 287                 | 270.3              | 159.2               | 287   |
| Sugar constraints:         |                     |                    |                     |       |
| C2' endo (south, B-form)   | C3'-C4'-O4'-C1' = 0 |                    |                     |       |
| C3' endo (north, A-form)   | C4'-O4'-C1'-C2' = 0 |                    |                     |       |

**Table S2.** List of DNA structures used for the survey data.

| <b>PDB ID</b> | <b>Type</b> | <b>Ref.</b>                                 | <b>PDB ID</b> | <b>Type</b> | <b>Ref.</b>                            |
|---------------|-------------|---------------------------------------------|---------------|-------------|----------------------------------------|
| 137D          | A-form      | Ramakrishnan <i>et al</i> <sup>1</sup>      | 477D          | B-form      | Minasov <i>et al</i> <sup>2</sup>      |
| 1ZEX          | A-form      | Hays <i>et al</i> <sup>3</sup>              | 158D          | B-form      | Grzeskowiak <i>et al</i> <sup>4</sup>  |
| 1ZEY          | A-form      | Hays <i>et al</i> <sup>3</sup>              | 194D          | B-form      | Balendiran <i>et al</i> <sup>5</sup>   |
| 1ZF1          | A-form      | Hays <i>et al</i> <sup>3</sup>              | 1CGC          | B-form      | Heinemann <i>et al</i> <sup>6</sup>    |
| 1ZF6          | A-form      | Hays <i>et al</i> <sup>3</sup>              | 1D29          | B-form      | Larsen <i>et al</i> <sup>7</sup>       |
| 1ZF8          | A-form      | Hays <i>et al</i> <sup>3</sup>              | 1D57          | B-form      | Yuan <i>et al</i> <sup>8</sup>         |
| 1ZF9          | A-form      | Hays <i>et al</i> <sup>3</sup>              | 1D65          | B-form      | Edwards <i>et al</i> <sup>9</sup>      |
| 1ZFA          | A-form      | Hays <i>et al</i> <sup>3</sup>              | 1D8G          | B-form      | Kielkopf <i>et al</i> <sup>10</sup>    |
| 2PKV          | A-form      | Girard <i>et al</i> <sup>11</sup>           | 1DCV          | B-form      | Eichman <i>et al</i> <sup>12</sup>     |
| 2PL4          | A-form      | Girard <i>et al</i> <sup>11</sup>           | 1DN9          | B-form      | Yoon <i>et al</i> <sup>13</sup>        |
| 2PL8          | A-form      | Girard <i>et al</i> <sup>11</sup>           | 1EN3          | B-form      | Chiu <i>et al</i> <sup>14</sup>        |
| 2PLB          | A-form      | Girard <i>et al</i> <sup>11</sup>           | 1EN9          | B-form      | Chiu <i>et al</i> <sup>14</sup>        |
| 440D          | A-form      | Gao <i>et al</i> <sup>15</sup>              | 1HQ7          | B-form      | Locasale <i>et al</i> <sup>16</sup>    |
| 1D78 + 1D79   | A-form      | Thota <i>et al</i> <sup>17</sup>            | 1IH1          | B-form      | Vargason <i>et al</i> <sup>18</sup>    |
| 368D          | A-form      | Fernandez <i>et al</i> <sup>19</sup>        | 1QC1          | B-form      | Timsit <i>et al</i> <sup>20</sup>      |
| 369D          | A-form      | Fernandez <i>et al</i> <sup>19</sup>        | 1S23          | B-form      | Valls <i>et al</i> <sup>21</sup>       |
| 370D          | A-form      | Fernandez <i>et al</i> <sup>19</sup>        | 1WQY          | B-form      | Arai <i>et al</i> <sup>22</sup>        |
| 371D          | A-form      | Fernandez <i>et al</i> <sup>19</sup>        | 1ZEW          | B-form      | Hays <i>et al</i> <sup>3</sup>         |
| 414D          | A-form      | Savitha <i>et al</i> <sup>23</sup>          | 1ZF5          | B-form      | Hays <i>et al</i> <sup>3</sup>         |
| 116D          | A-form      | Bingman <i>et al</i> <sup>24</sup>          | 1ZFC          | B-form      | Hays <i>et al</i> <sup>3</sup>         |
| 126D          | A-form      | Goodsell <i>et al</i> <sup>25</sup>         | 1ZFE          | B-form      | Hays <i>et al</i> <sup>3</sup>         |
| 138D          | A-form      | Ramakrishnan <i>et al</i> <sup>1</sup>      | 1ZFF          | B-form      | Hays <i>et al</i> <sup>3</sup>         |
| 160D          | A-form      | Ramakrishnan <i>et al</i> <sup>26</sup>     | 1ZFM          | B-form      | Hays <i>et al</i> <sup>3</sup>         |
| 1DNZ          | A-form      | Robinson <i>et al</i> <sup>27</sup>         | 251D          | B-form      | Wahl <i>et al</i> <sup>28</sup>        |
| 1G00          | A-form      | Urpi <i>et al</i> <sup>29</sup>             | 3DNB          | B-form      | Prive <i>et al</i> <sup>30</sup>       |
| 257D          | A-form      | Mooers <i>et al</i> <sup>31</sup>           | 3GGB          | B-form      | Maehigashi <i>et al</i> <sup>32</sup>  |
| 260D          | A-form      | Ban <i>et al</i> <sup>33</sup>              | 3GGI          | B-form      | Maehigashi <i>et al</i> <sup>32</sup>  |
| 287D          | A-form      | Shatzky-Schwartz <i>et al</i> <sup>34</sup> | 3GGK          | B-form      | Maehigashi <i>et al</i> <sup>32</sup>  |
| 28DN          | A-form      | Courseille <i>et al</i> <sup>35</sup>       | 5DNB          | B-form      | Prive <i>et al</i> <sup>30</sup>       |
| 401D          | A-form      | Finley <i>et al</i> <sup>36</sup>           | 436D          | B-form      | Tereshko <i>et al</i> <sup>37</sup>    |
| 441D          | A-form      | Gao <i>et al</i> <sup>15</sup>              | 460D          | B-form      | Tereshko <i>et al</i> <sup>38</sup>    |
| 9DNA          | A-form      | Heinemann <i>et al</i> <sup>39</sup>        | 461D          | B-form      | Tereshko <i>et al</i> <sup>38</sup>    |
| 196D          | B-form      | Goodsell <i>et al</i> <sup>40</sup>         | 1BNA          | B-form      | Drew <i>et al</i> <sup>41</sup>        |
| 1D49          | B-form      | Quintana <i>et al</i> <sup>42</sup>         | 1D23          | B-form      | Grzeskowiak <i>et al</i> <sup>43</sup> |
| 1D56          | B-form      | Yuan <i>et al</i> <sup>8</sup>              | 1JGR          | B-form      | Howerton <i>et al</i> <sup>44</sup>    |
| 1FQ2          | B-form      | Sines <i>et al</i> <sup>45</sup>            | 431D          | B-form      | Vlieghe <i>et al</i> <sup>46</sup>     |
| 1ZF0          | B-form      | Hays <i>et al</i> <sup>3</sup>              | 476D          | B-form      | Minasov <i>et al</i> <sup>2</sup>      |
| 1ZF7          | B-form      | Hays <i>et al</i> <sup>3</sup>              | 355D          | B-form      | Shui <i>et al</i> <sup>47</sup>        |
| 1ZFB          | B-form      | Hays <i>et al</i> <sup>3</sup>              |               |             |                                        |
| 1ZFG          | B-form      | Hays <i>et al</i> <sup>3</sup>              |               |             |                                        |

**Table S3.** List of RNA structures used for the survey data.

| <b>PDB ID</b> | <b>Type</b>          | <b>Ref.</b>                             |
|---------------|----------------------|-----------------------------------------|
| 157D          | Canonical            | Leonard <i>et al</i> <sup>48</sup>      |
| 1DQH          | Canonical with Bulge | Xiong <i>et al</i> <sup>49</sup>        |
| 1EHZ          | tRNA                 | Shi <i>et al</i> <sup>50</sup>          |
| 1F27          | Pseudoknot           | Nix <i>et al</i> <sup>51</sup>          |
| 1L2X          | Pseudoknot           | Egli <i>et al</i> <sup>52</sup>         |
| 1MME          | Ribozyme             | Scott <i>et al</i> <sup>53</sup>        |
| 1MSY          | Tetraloop            | Correll <i>et al</i> <sup>54</sup>      |
| 1Q9A          | Hairpin              | Correll <i>et al</i> <sup>55</sup>      |
| 1RNA          | Canonical            | Dock-Bregeon <i>et al</i> <sup>56</sup> |
| 1SA9          | Canonical            | Jang <i>et al</i> <sup>57</sup>         |
| 1SDR          | Canonical            | Schindelin <i>et al</i> <sup>58</sup>   |
| 1XPE          | Kissing complex      | Ennifar <i>et al</i> <sup>59</sup>      |
| 1Y26          | Riboswitch           | Serganov <i>et al</i> <sup>60</sup>     |
| 1ZCI          | Kissing complex      | Ennifar <i>et al</i> <sup>59</sup>      |
| 1ZEV          | Canonical            | Mooers <i>et al</i> <sup>61</sup>       |
| 259D          | Canonical            | Egli <i>et al</i> <sup>62</sup>         |
| 280D          | Canonical            | Lietzke <i>et al</i> <sup>63</sup>      |
| 2FD0          | Kissing complex      | Ennifar <i>et al</i> <sup>64</sup>      |
| 2V6W          | tRNA acceptor        | Forster <i>et al</i> <sup>65</sup>      |
| 353D          | Canonical            | Betzel <i>et al</i> <sup>66</sup>       |
| 397D          | Canonical with Bulge | Ippolito <i>et al</i> <sup>67</sup>     |
| 3DW5          | Hairpin              | Olieric <i>et al</i> <sup>68</sup>      |
| 3DW7          | Hairpin              | Olieric <i>et al</i> <sup>68</sup>      |
| 3FAR          | Canonical            | Ennifar <i>et al</i> <sup>69</sup>      |
| 3L0U          | tRNA                 | Byrne <i>et al</i> <sup>70</sup>        |
| 402D          | Canonical            | Jang <i>et al</i> <sup>71</sup>         |
| 405D          | Canonical            | Pan <i>et al</i> <sup>72</sup>          |
| 433D          | Canonical            | Trikha <i>et al</i> <sup>73</sup>       |
| 434D          | Canonical            | Mueller <i>et al</i> <sup>74</sup>      |
| 435D          | Canonical            | Mueller <i>et al</i> <sup>74</sup>      |
| 437D          | Pseudoknot           | Su <i>et al</i> <sup>75</sup>           |
| 438D          | Canonical            | Shi <i>et al</i> <sup>76</sup>          |
| 472D          | Canonical            | Deng <i>et al</i> <sup>77</sup>         |
| 480D          | Canonical            | Correll <i>et al</i> <sup>78</sup>      |
| 483D          | Canonical            | Correll <i>et al</i> <sup>78</sup>      |

## Supporting Information References:

- (1) Ramakrishnan, B.; Sundaralingam, M. *Biochemistry* **1993**, *32*, 11458-11468.
- (2) Minasov, G.; Tereshko, V.; Egli, M. *J Mol Biol* **1999**, *291*, 83-99.
- (3) Hays, F. A.; Teegarden, A.; Jones, Z. J.; Harms, M.; Raup, D.; Watson, J.; Cavaliere, E.; Ho, P. S. *Proc. Nat'l. Acad. Science USA* **2005**, *102*, 7157-7162.
- (4) Grzeskowiak, K.; Goodsell, D. S.; Kaczor-Grzeskowiak, M.; Cascio, D.; Dickerson, R. E. *Biochem* **1993**, *32*, 8923-8931.
- (5) Balendiran, K.; Rao, S. T.; Sekharudu, C. Y.; Zon, G.; Sundaralingam, M. *Acta Crystallogr. Sect. D* **1995**, *51*, 190-198.
- (6) Heinemann, U.; Alings, C.; Bansal, M. *EMBO J* **1992**, *11*, 1931-1939.
- (7) Larsen, T. A.; Kopka, M. L.; Dickerson, R. E. *Biochem* **1991**, *30*, 4443-4449.
- (8) Yuan, H.; Quintana, J.; Dickerson, R. E. *Biochem* **1992**, *31*, 8009-8021.
- (9) Edwards, K. J.; Brown, D. G.; Spink, N.; Skelly, J. V.; Neidle, S. *J Mol Biol* **1992**, *226*, 1161-1173.
- (10) Kielkopf, C. L.; Ding, S.; Kuhn, P.; Rees, D. C. *J Mol Biol* **2000**, *296*, 787-801.
- (11) Girard, E.; Prange, T.; Dhaussy, A. C.; Migianu-Griffoni, E.; Lecouvey, M.; Chervin, J. C.; Mezouar, M.; Kahn, R.; Fourme, R. *Nucleic Acids Res.* **2007**, *35*, 4800-4808.
- (12) Eichman, B. F.; Vargason, J. M.; Mooers, B. H.; Ho, P. S. *Proc. Nat'l. Acad. Science USA* **2000**, *97*, 3971-3976.
- (13) Yoon, C.; Prive, G. G.; Goodsell, D. S.; Dickerson, R. E. *Proc. Nat'l. Acad. Science USA* **1988**, *85*, 6332-6336.
- (14) Chiu, T. K.; Dickerson, R. E. *J Mol Biol* **2000**, *301*, 915-945.
- (15) Gao, Y. G.; Robinson, H.; Wang, A. H. *Eur. J. Biochem* **1999**, *261*, 413-420.
- (16) Locasale, J. W.; Napoli, A. A.; Chen, S.; Berman, H. M.; Lawson, C. L. *J Mol Biol* **2009**, *386*, 1054-1065.
- (17) Thota, N.; Li, X. H.; Bingman, C.; Sundaralingam, M. *Acta Crystallogr. Sect. D* **1993**, *49*, 282-291.
- (18) Vargason, J. M.; Henderson, K.; Ho, P. S. *Proc. Nat'l. Acad. Science USA* **2001**, *98*, 7265-7270.
- (19) Fernandez, L. G.; Subirana, J. A.; Verdaguer, N.; Pyshtnyi, D.; Campos, L.; Malinina, L. *J. Biomol. Struct. Dyn.* **1997**, *15*, 151-163.
- (20) Timsit, Y.; Moras, D. *EMBO J* **1994**, *13*, 2737-2746.
- (21) Valls, N.; Wright, G.; Steiner, R. A.; Murshudov, G. N.; Subirana, J. A. *Acta Crystallogr. Sect. D* **2004**, *60*, 680-685.
- (22) Arai, S.; Chatake, T.; Ohhara, T.; Kurihara, K.; Tanaka, I.; Suzuki, N.; Fujimoto, Z.; Mizuno, H.; Niimura, N. *Nucleic Acids Res.* **2005**, *33*, 3017-3024.
- (23) Savitha, G.; Viswamitra, M. A. *Acta Crystallogr. Sect. D* **1999**, *55*, 1136-1143.
- (24) Bingman, C. A.; Zon, G.; Sundaralingam, M. *J Mol Biol* **1992**, *227*, 738-756.
- (25) Goodsell, D. S.; Kopka, M. L.; Cascio, D.; Dickerson, R. E. *Proc. Nat'l. Acad. Science USA* **1993**, *90*, 2930-2934.
- (26) Ramakrishnan, B.; Sundaralingam, M. *J Mol Biol* **1993**, *231*, 431-444.
- (27) Robinson, H.; Gao, Y. G.; Sanishvili, R.; Joachimiak, A.; Wang, A. H. *Nucleic Acids Res.* **2000**, *28*, 1760-1766.
- (28) Wahl, M. C.; Rao, S. T.; Sundaralingam, M. *Biophys J* **1996**, *70*, 2857-2866.
- (29) Urpi, L.; Navaza, J.; Subirana, J. A. *J. Biomol. Struct. Dyn.* **2000**, *18*, 363-369.

- (30) Prive, G. G.; Yanagi, K.; Dickerson, R. E. *J Mol Biol* **1991**, *217*, 177-199.
- (31) Mooers, B. H.; Schroth, G. P.; Baxter, W. W.; Ho, P. S. *J Mol Biol* **1995**, *249*, 772-784.
- (32) Maehigashi, T.; Woods, K. K.; Moulaei, T.; Komeda, S.; Williams, L. D.
- (33) Ban, C.; Sundaralingam, M. *Biophys J* **1996**, *71*, 1222-1227.
- (34) Shatzky-Schwartz, M.; Arbuckle, N. D.; Eisenstein, M.; Rabinovich, D.; Bareket-Samish, A.; Haran, T. E.; Luisi, B. F.; Shakked, Z. *J Mol Biol* **1997**, *267*, 595-623.
- (35) Courseille, C.; Dautant, A.; Hospital, M.; Langlois D'Estaintot, B.; Precigoux, G.; Molko, D.; Teoule, R. *Acta Crystallogr. Sect. A* **1990**, *46*, F9-F12.
- (36) Finley, J. B.; Luo, M. *Nucleic Acids Res.* **1998**, *26*, 5719-5727.
- (37) Tereshko, V.; Minasov, G.; Egli, M. *JACS* **1999**, *121*, 470-471.
- (38) Tereshko, V.; Minasov, G.; Egli, M. *JACS* **1999**, *121*, 3590-3595.
- (39) Heinemann, U.; Lauble, H.; Frank, R.; Blocker, H. *Nucleic Acids Res.* **1987**, *15*, 9531-9550.
- (40) Goodsell, D. S.; Grzeskowiak, K.; Dickerson, R. E. *Biochem* **1995**, *34*, 1022-1029.
- (41) Drew, H. R.; Wing, R. M.; Takano, T.; Broka, C.; Tanaka, S.; Itakura, K.; Dickerson, R. E. *Proc. Nat'l. Acad. Science USA* **1981**, *78*, 2179-2183.
- (42) Quintana, J. R.; Grzeskowiak, K.; Yanagi, K.; Dickerson, R. E. *J Mol Biol* **1992**, *225*, 379-395.
- (43) Grzeskowiak, K.; Yanagi, K.; Prive, G. G.; Dickerson, R. E. *J Biol Chem* **1991**, *266*, 8861-8883.
- (44) Howerton, S. B.; Sines, C. C.; VanDerveer, D.; Williams, L. D. *Biochem* **2001**, *40*, 10023-10031.
- (45) Sines, C. C.; McFail-Isom, L.; Howerton, S. B.; VanDerveer, D.; Williams, L. D. *JACS* **2000**, *122*, 11048-11056.
- (46) Vlieghe, D.; Turkenburg, J. P.; Van Meervelt, L. *Acta Crystallogr. Sect. D* **1999**, *55*, 1495-1502.
- (47) Shui, X.; McFail-Isom, L.; Hu, G. G.; Williams, L. D. *Biochem* **1998**, *37*, 8341-8355.
- (48) Leonard, G. A.; McAuley-Hecht, K. E.; Ebel, S.; Lough, D. M.; Brown, T.; Hunter, W. N. *Structure* **1994**, *2*, 483-494.
- (49) Xiong, Y.; Sundaralingam, M. *RNA* **2000**, *6*, 1316-1324.
- (50) Shi, H.; Moore, P. B. *RNA* **2000**, *6*, 1091-1105.
- (51) Nix, J.; Sussman, D.; Wilson, C. *J Mol Biol* **2000**, *296*, 1235-1244.
- (52) Egli, M.; Minasov, G.; Su, L.; Rich, A. *Proc. Nat'l. Acad. Science USA* **2002**, *99*, 4302-4307.
- (53) Scott, W. G.; Finch, J. T.; Klug, A. *Cell* **1995**, *81*, 991-1002.
- (54) Correll, C. C.; Swinger, K. *RNA* **2003**, *9*, 355-363.
- (55) Correll, C. C.; Beneken, J.; Plantinga, M. J.; Lubbers, M.; Chan, Y. L. *Nucleic Acids Res.* **2003**, *31*, 6806-6818.
- (56) Dock-Bregeon, A. C.; Chevrier, B.; Podjarny, A.; Johnson, J.; de Bear, J. S.; Gough, G. R.; Gilham, P. T.; Moras, D. *J Mol Biol* **1989**, *209*, 459-474.
- (57) Jang, S. B.; Baeyens, K.; Jeong, M. S.; SantaLucia, J.; Turner, D.; Holbrook, S. R. *Acta Crystallogr. Sect. D* **2004**, *60*, 829-835.



- (58) Schindelin, H.; Zhang, M.; Bald, R.; Furste, J. P.; Erdmann, V. A.; Heinemann, U. *J Mol Biol* **1995**, *249*, 595-603.
- (59) Ennifar, E.; Dumas, P. *J Mol Biol* **2006**, *356*, 771-782.
- (60) Serganov, A.; Yuan, Y. R.; Pikovskaya, O.; Polonskaia, A.; Malinina, L.; Phan, A. T.; Hobartner, C.; Micura, R.; Breaker, R. R.; Patel, D. J. *Chem Biol* **2004**, *11*, 1729-1741.
- (61) Mooers, B. H.; Logue, J. S.; Berglund, J. A. *Proc. Nat'l. Acad. Science USA* **2005**, *102*, 16626-16631.
- (62) Egli, M.; Portmann, S.; Usman, N. *Biochem* **1996**, *35*, 8489-8494.
- (63) Lietzke, S. E.; Barnes, C. L.; Berglund, J. A.; Kundrot, C. E. *Structure* **1996**, *4*, 917-930.
- (64) Ennifar, E.; Paillart, J. C.; Bodlener, A.; Walter, P.; Weibel, J.-M.; Aubertin, A.-M.; Pale, P.; Dumas, P.; Marquet, R. *Nucleic Acids Res.* **2006**, *34*, 2328-2339.
- (65) Forster, C.; Brauer, A. B. E.; Brode, S.; Furste, J. P.; Betzel, C.; Erdmann, V. A. *Acta Crystallogr. Sect. D* **2007**, *63*, 1154.
- (66) Betzel, C.; Lorenz, S.; Furste, J. P.; Bald, R.; Zhang, M.; Schneider, T. R.; Wilson, K. S.; Erdmann, V. A. *FEBS Letters* **1994**, *351*, 159-164.
- (67) Ippolito, J. A.; Steitz, T. A. *Proc. Nat'l. Acad. Science USA* **1998**, *95*, 9819-9824.
- (68) Olieric, V.; Rieder, U.; Lang, K.; Serganov, A.; Schulze-Briese, C.; Micura, R.; Dumas, P.; Ennifar, E. *RNA* **2009**, *15*, 707-715.
- (69) Ennifar, E.; Walter, P.; Dumas, P.
- (70) Byrne, R. T.; Konevega, A. L.; Rodnina, M. V.; Antson, A. A. *Nucleic Acids Res.* **2010**, *38*, 4154-4162.
- (71) Jang, S. B.; Hung, L. W.; Chi, Y. I.; Holbrook, E. L.; Carter, R. J.; Holbrook, S. R. *Biochem* **1998**, *37*, 11726-11731.
- (72) Pan, B.; Mitra, S. N.; Sundaralingam, M. *J Mol Biol* **1998**, *283*, 977-984.
- (73) Trikha, J.; Filman, D. J.; Hogle, J. M. *Nucleic Acids Res.* **1999**, *27*, 1728-1739.
- (74) Mueller, U.; Schubel, H.; Sprinzl, M.; Heinemann, U. *RNA* **1999**, *5*, 670-677.
- (75) Su, L.; Chen, L.; Egli, M.; Berger, J. M.; Rich, A. *Nat. Struct. Biol.* **1999**, *6*, 285-292.
- (76) Shi, K.; Wahl, M.; Sundaralingam, M. *Nucleic Acids Res.* **1999**, *27*, 2196-2201.
- (77) Deng, J.; Sundaralingam, M. *Nucleic Acids Res.* **2000**, *28*, 4376-4381.
- (78) Correll, C. C.; Wool, I. G.; Munishkin, A. *J Mol Biol* **1999**, *292*, 275-287.
- (79) Brooks, B.R.; Brooks, C.L.; MacKerell Jr., A.D.; Nilsson, L.; Petrella, R.J. Roux, B.; Won, Y.; Archontis, G.; Bartels, C.; Boresch, S.; Caflisch, A.; Caves, L.; Cui, Q.; Dinner, A.R.; Feig, M.; Fischer, S.; Gao, J.; Hodosecek, M.; Im, W.; Kuczera, K.; Lazaridis, T.; Ma, J.; Ovchinnikov, V.; Paci, E.; Pastor, R.W.; Post, C.B.; Pu, J.Z.; Schaefer, M.; Tidor, B.; Venable, R.M.; Woodcock, H.L.; Wu, X.; Yang, W.; York, D.M.; Karplus, M. *J. Comput. Chem.* **2009**, *30*, 1545-1614.
- (80) Frisch, M. J. Trucks, G. W.; Schlegel, H. B.; Scuseria, G. E.; Robb, M. A.; Cheeseman, J. R.; Montgomery, J., J. A.; Vreven, T.; Kudin, K. N.; Burant, J. C.; Millam, J. M.; Iyengar, S. S.; Tomasi, J.; Barone, V.; Mennucci, B.; Cossi, M.; Scalmani, G.; Rega, N.; Petersson, G. A.; Nakatsuji, H.; Hada, M.; Ehara, M.; Toyota, K.; Fukuda, R.; Hasegawa, J.; Ishida, M.; Nakajima, T.; Honda, Y.; Kitao, O.; Nakai, H.; Klene, M.; Li, X.; Knox, J. E.; Hratchian, H. P.; Cross, J. B.; Bakken, V.; Adamo, C.; Jaramillo, J.; Gomperts, R.; Stratmann, R. E.; Yazyev, O.; Austin, A. J.; Cammi, R.; Pomelli, C.; Ochterski, J. W.; Ayala, P. Y.; Morokuma, K.; Voth, G. A.; Salvador, P.; Dannenberg, J. J.; Zakrzewski, V. G.; Dapprich, S.;

Daniels, A. D.; Strain, M. C.; Farkas, O.; Malick, D. K.; Rabuck, A. D.; Raghavachari, K.; Foresman, J. B.; Ortiz, J. V.; Cui, Q.; Baboul, A. G.; Clifford, S.; Cioslowski, J.; Stefanov, B. B.; Liu, G.; Liashenko, A.; Piskorz, P.; Komaromi, I.; Martin, R. L.; Fox, D. J.; Keith, T.; Al-Laham, M. A.; Peng, C. Y.; Nanayakkara, A.; Challacombe, M.; Gill, P. M. W.; Johnson, B.; Chen, W.; Wong, M. W.; Gonzalez, C.; Pople, J. A. *Gaussian, Inc* Wallingford CT, 2004.

(81) Shao, Y. Fusti-Molnar, L.; Jung, Y.; Kussmann, J.; Ochsenfeld, C.; Brown, S. T.; Gilbert, A. T. B.; Slipchenko, L. V.; Levchenko, S. V.; O'Neill, D. P.; Distasio Jr., R. A.; Lochan, R. C.; Wang, T.; Beran, G. J. O.; Besley, N. A.; Herbert, J. M.; Lin, C. Y.; Van Voorhis, T.; Chien, S. H.; Sodt, A.; Steele, R. P.; Rassolov, V. A.; Maslen, P. E.; Korambath, P. P.; Adamson, R. D.; Austin, B.; Baker, J.; Byrd, E. F. C.; Dachsel, H.; Doerksen, R. J.; Dreuw, A.; Dunietz, B. D.; Dutoi, A. D.; Furlani, T. R.; Gwaltney, S. R.; Heyden, A.; Hirata, S.; Hsu, C.-P.; Kedziora, G.; Khalliulin, R. Z.; Klunzinger, P.; Lee, A. M.; Lee, M. S.; Liang, W.; Lotan, I.; Nair, N.; Peters, B.; Proynov, E. I.; Pieniazek, P. A.; Rhee, Y. M.; Ritchie, J.; Rosta, E.; Sherrill, C. D.; Simmonett, A. C.; Subotnik, J. E.; Woodcock III, H. L.; Zhang, W.; Bell, A. T.; Chakraborty, A. K.; Chipman, D. M.; Keil, F. J.; Warshel, A.; Hehre, W. J.; Schaefer III, H. F.; Kong, J.; Krylov, A. I.; Gill, P. M. W.; Head-Gordon, M. *J. Phys Chem Chem* **2006**, *8*, 3172-3191.
